# Supplementary material
Source: PubMed Central journal article supplement (PMC4809524)
Supplement: NIHMS770925-supplement-1.pdf [file NIHMS770925-supplement-1.pdf]

## Supplemental Information

The solution structure of the forkhead box-O DNA binding domain of *Brugia malayi*  
DAF-16a

Sarah K. Casper<sup>1,2^</sup>, Scott J. Schoeller<sup>3^</sup>, Danielle M. Zgoba<sup>1</sup>, Andrew J. Phillips<sup>3</sup>,  
Thomas J. Morien<sup>3</sup>, Gary R. Chaffee<sup>3</sup>, Peter C. Sackett<sup>1#</sup>, Francis C. Peterson<sup>4</sup>, Kirsten  
Crossgrove<sup>1\*</sup> and Christopher T. Veldkamp<sup>3,4\*</sup>

<sup>1</sup>Department of Biological Sciences, University of Wisconsin-Whitewater, 800 West  
Main Street, Whitewater, WI 53190, <sup>2</sup>Department of Health Sciences, Blackhawk  
Technical College, 1740 U.S. 41, Janesville, WI 53545, <sup>3</sup>Department of Chemistry,  
University of Wisconsin-Whitewater, 800 West Main Street, Whitewater, WI 53190,  
<sup>4</sup>Department of Biochemistry, Medical College of Wisconsin, 8701 Watertown Plank  
Road, Milwaukee, WI 53226

\*Corresponding authors

^These authors contributed equally.

#Current Address: Evonik Industries, 900 S Palm St, Janesville, WI 53548.

## Supplemental Figures

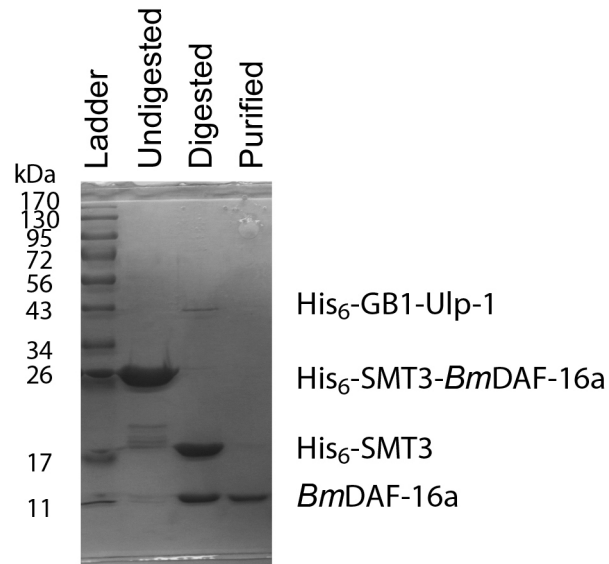

**Figure S1. SDS-PAGE analysis of the purification of *BmDAF-16a* (342-442).** Lane 1 contains molecular weight standards. Lane 2 contains refolded His<sub>6</sub>-SMT3-*BmDAF-16a* (342-442) fusion protein. Lane 3 contains Ulp-1 digested fusion protein that was loaded onto an IMAC column. Lane 4 contains purified *BmDAF-16a* (342-442), the flow through from the IMAC column.

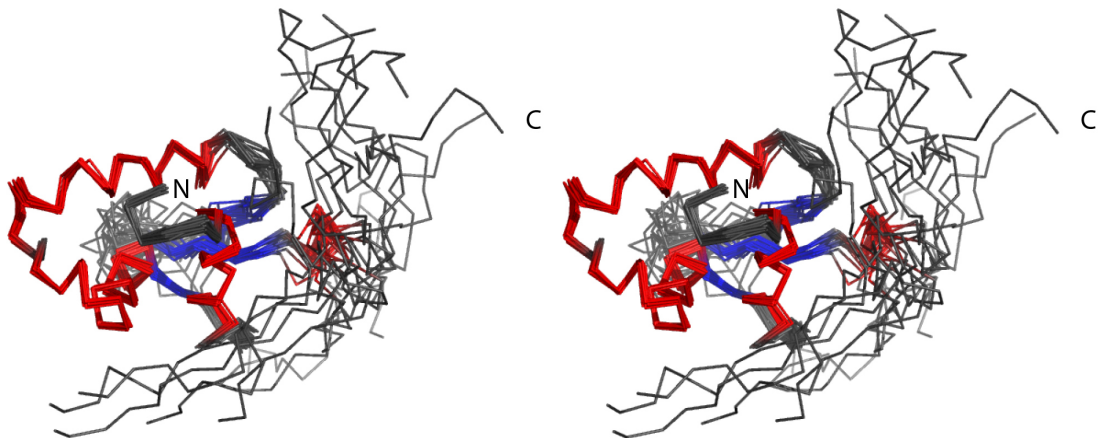

**Figure S2. Stereo view of the ensemble of 20 *BmDAF-16a* (342-442) structures.**

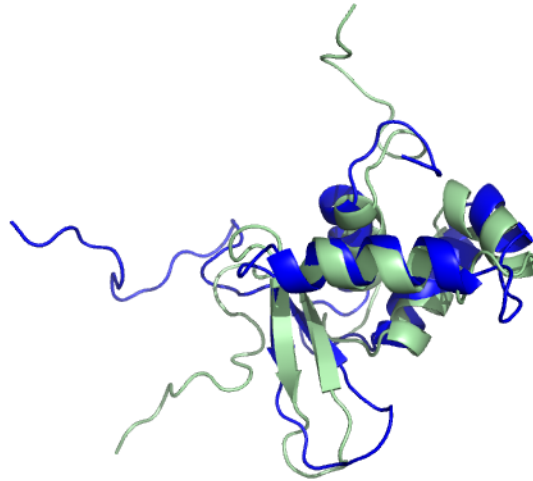

**Figure S3. Superimposition of *Bm*-DAF-16a (342-442) (blue) and FOXO3a (PDB ID 2K86) (green).** *Bm*-DAF-16a (342-442) and the DNA binding domain of FOXO3a are substantially similar with most small differences located at the termini or in loops.
